Oral health literacy, oral health behavior, and oral health status among  
dental patients and associated factors

Ran An<sup>1, 2</sup>

Qianqian Li<sup>3</sup>

Yuan Luo<sup>2</sup>

Wenfeng Chen<sup>1</sup>

Muhammad Sohaib<sup>2,4</sup>

Meizi Liu<sup>1</sup>

Zitong Wu<sup>1, 2</sup>

<sup>1</sup> Teaching and Research Section of Clinical Nursing, Xiangya Hospital Central South University, Hunan, China

<sup>2</sup> Xiangya School of Nursing, Central South University, Hunan, China

<sup>3</sup> The first Mobile Corps Hospital of the Chinese People's Armed Police Force, Hebei, China

<sup>4</sup> Children hospital and Institute of child health, Multan, Pakistan.

Ran An

+86 19198070836

Master Student in Nursing Science

Xiangya School of Nursing, Central South University,

Changsha, Hunan Province, China

ar191980@126.com

Qianqian Li

Teaching Nurse

The first Mobile Corps Hospital of the Chinese People's Armed Police Force

Baoding City, Hebei Province, China

g198816dhuli@163.com

Yuan Luo

Master Student in Nursing Science

Xiangya School of Nursing, Central South University,

Changsha, Hunan Province, China

luoyuan0609@qq.com

Wenfeng Chen

Associate Professor

Teaching and Research Section of Clinical Nursing, Xiangya Hospital Central South  
University

Changsha, Hunan Province, China

17862971657@163.com

Muhammad Sohaib

Master Student in Nursing Science

Xiangya School of Nursing, Central South University; Children hospital and Institute  
of child health, Multan, Pakistan.

+923087889787

msohaibhss96@hotmail.com

Meizi Liu

+86 18638099153

Master Student in Nursing Science

Xiangya School of Nursing, Central South University,

No.87 Xiangya Road, Kaifu District

Changsha, Hunan Province, China

1173533171@qq.com

Zitong Wu

+86 15084840861

Master Student in Nursing Science

Xiangya School of Nursing, Central South University,

No.87 Xiangya Road, Kaifu District

Changsha, Hunan Province, China

1780558316@qq.com

### **Corresponding author**

Wenfeng Chen

17862971657@163.com

### **Present/permanent address**

Xiangya Hospital of Central South University, No.87 Xiangya Road, Kaifu District,

Changsha, Hunan Province, China

### **Abstract**

**Background:** Oral health plays an important role in overall health. Little is known about oral health literacy, oral health behavior, and oral health status in dental patients.

**Purpose:** This study aimed to assess oral health literacy (OHL), oral health behavior, oral health status, and associated factors in dental patients.

**Methods:** This cross-sectional study was conducted between June,13, 2022 and July,

26, 2022 in a tertiary general hospital, in Hebei, China. A total of 184 patients participated in the study. OHL was assessed by the Chinese version of the Health Literacy Dental Scale (HeLD-14). Trained interviewers performed face-to-face interviews for oral health-related behavior information. Data were analyzed using SPSS version 24. Mann–Whitney U-tests, chi-square tests, and binary logistic regression analysis were performed.

**Results:** Participants were 184 dental patients which consisted of 78.3% men and a mean age of  $28.36 \pm 10.72$  years old. The mean oral health literacy score was  $43.07 \pm 9.920$  (out of 56). There were significant associations between inadequate OHL and economic burden (odds ratio [OR]=2.636, P = 0.003), mouthwash (OR=2.433, P = 0.006), gum bleeding (OR=3.798, P = 0.030), and dental visiting (OR=1.885, P = 0.049).

**Conclusion** The oral health literacy of dental patients is at a medium level overall. Patients with inadequate OHL had a higher frequency of bleeding gums and less frequent dental visiting. Health care providers should consider improving oral health literacy among dental patients.

**Keywords** Oral health literacy; Oral health behavior; Oral health status; dental patients; Cross-sectional study

## 1 **Background**

2 Globally, about 3.5 billion people worldwide suffer from oral diseases[1], oral diseases  
3 lead to serious health and economic burdens, causing pain, and sepsis, greatly reducing  
4 the quality of life [1]. The World Health Organization advocates the promotion of oral  
5 health care and public health practices and approved a resolution on oral health in 2021  
6 to encourage the proactive promotion of one's health [2, 3]. China has also introduced  
7 guidelines and policies such as the "Healthy China Action (2019-2030)" and the  
8 "Healthy Mouth Action Program (2019-2025)" to strengthen oral health management  
9 and oral education[4].

10 At present, studies on oral health research are mainly focused on teenagers, the elderly,  
11 pregnant women, and adults [5-7], while the literature on oral health and oral health  
12 behaviors of dental patients is sparse, who have a high prevalence of oral diseases,  
13 deserve more attention. According to the Fourth National Oral Health Survey (2015-  
14 2016) in mainland China[8], a large proportion (52.8%~69.3%) of Chinese adults have  
15 periodontal disease [8]. In contrast to the high prevalence, less than 20% of Chinese  
16 adults were knowledgeable about periodontal disease. Moreover, little is known about  
17 the problems with their oral health behaviors and how they are affected by oral health  
18 problems and the associated factors.

19 In recent years, oral health literacy (OHL) has emerged as a possible underlying  
20 mechanism that explains oral health status in many groups [16-19], oral health literacy  
21 is the capacity to understand oral health information and use it to inform beneficial oral

22 health prevention and treatment decisions [20]. OHL is regarded as being essential to  
23 the promotion of oral health and the avoidance of oral diseases [21]. Besides, OHL is  
24 regarded to largely reflect underlying social and personal values related to dental care,  
25 and oral health outcomes[9, 10]. A study in Iran showed that 62.5% of adult patients  
26 had an adequate oral health literacy level[9]. However, a survey of older adults in  
27 Thailand showed the majority of participants (85%) had inadequate functional health  
28 literacy,[11]. Previous studies show that people with limited OHL levels had poor  
29 periodontal health[12]. Oral health literacy has also been confirmed to be strongly  
30 associated with oral health behaviors[13] and oral health-related quality of life[14].  
31 To the best of our knowledge, no prior research was conducted in China to evaluate oral  
32 health literacy in dental patients. The purpose of this study is to evaluate oral health  
33 literacy, oral health behaviors, and oral health status in dental patients and the associated  
34 factors, which are important for improving oral health status and quality of life.

## 35 **Methods**

### 36 **Study design**

37 A descriptive cross-sectional study design was conducted from June, 13, 2022 to July,  
38 26, 2022 with 184 patients aged from 18 to 77 years old that attended the Department  
39 of Stomatology of the First Mobile General Hospital of Armed Police, Hebei, China.

### 40 **Inclusion and exclusion criteria**

41 (1) Inclusion criteria: aged  $\geq 18$  years, who attended at the dental clinic; clear  
42 consciousness, able to make independent judgments and complete the questionnaire;

43 informed consent and voluntary participation in the study

44 (2) Exclusion criteria: mental disorders or other serious illnesses, unable to cooperate  
45 with the completion of the questionnaire.

#### 46 **Sampling**

47 Since there is no survey on oral health literacy for outpatients in the dental clinic, we  
48 refer to the survey on oral health literacy of adults[6], whose incidence of low level of  
49 oral health literacy is about 12.4%,  $n = \frac{u^2 p (1-p)}{\delta^2}$ , so this study takes  $p=0.124$  as  
50 the basis for estimating the sample size,  $n$  = the desired sample size when the population  
51 is greater than 10,000,  $\delta$  is the allowable error,  $\delta = 0.05$  is set in this study, take  $\alpha =$   
52  $0.05$ ,  $u$  = the standard normal deviate, usually set at 1.96 which corresponds to 95%  
53 confidence level, the final calculation of the sample content required for this study  $n \approx$   
54 162, the effective response rate is calculated according to 90%, then the sample size  
55 required for this study is 180.

#### 56 **Data collection**

57 Data were collected by 2 trained nurses who had prior experience with national survey  
58 data collection. The nurses met with potential participants to explain the aim of the  
59 study and the process of data collection. Those willing to participate were asked to  
60 complete an informed consent form to the researcher. Participants were asked to  
61 complete the questionnaire on their own without interruption, which consisted of a  
62 socio-demographics questionnaire and an oral health literacy scale.

#### 63 **Socio-demographics questionnaire**

64 A self-administered structured questionnaire was adapted after reviewing the relevant  
65 literature[15-17]. It had been validated and pretested on 30 health professionals  
66 working at the hospital for its consistency. The questionnaire has three main parts: (1)  
67 The first part contains items on sociodemographic information of participants, such as  
68 age, gender, place of residence, marital status, whether living alone, education level,  
69 smoking history, drinking history, sleep status and monthly household incomes; (2) The  
70 second part is related to participants' information on clinical characteristics, such as the  
71 reason for consultation and disease type; (3) The third part contains 7 items to evaluate  
72 oral health behaviors and oral health status, including daily brushing frequency, daily  
73 rinsing, whether mouthwash daily, flossing, whether there was gum bleeding when  
74 brushing, whether they had dental visiting in the past year, learning about oral health  
75 knowledge, and self-assessment of oral health status.

#### 76 **Oral Health Literacy**

77 The simplified version of the Health Literacy Dental Scale -14(HeLD-14) was  
78 developed by Jones[18]based on the full version of the Health Literacy Dental Scale  
79 (HeLD-29). Chinese scholar Yan[19] adapted and tested the Chinese version of the  
80 scale, which is a valid and reliable questionnaire for this purpose, before the study  
81 started, we obtained the authorization of the authors. The Chinese version of the scale's  
82 Cronbach's alpha value was 0.89, and the test-retest reliability was 0.786, indicating an  
83 adequate level of inter-item reliability. The scale has 14 questions divided equally into  
84 seven dimensions. Each item was scored using a 5-point Likert scale ranging from 1

85 (without any difficulty) to 5 (unable to do). The analysis first converted the 5 points to  
86 0, the 4 points to 1, the 3 points to 2, the 2 points to 3, the 1 point to 4, then the total  
87 score was calculated, with higher scores indicating higher oral health literacy.

## 88 **Statistical analysis**

89 The data were analyzed using SPSS statistical software version 24.0 (SPSS, Central  
90 south university, China). Descriptive statistics were used to describe the demographic  
91 characteristics and general information among patients. Associations of the OHL with  
92 general demographic information, clinical characteristics information, and oral health  
93 behaviors were analyzed by Chi-square tests. Based on the median split, HeLD-14  
94 scores were dichotomized into two groups ( $\geq 44$  vs.  $<44$ ), and a binary logistic  
95 regression model was used for the analysis. A multivariate logistic regression model  
96 was developed to test associations between OHL and other potential associated factors.  
97 Differences were considered statistically significant at  $P < 0.05$ .

## 98 **Ethical approval and informed consent**

99 The study was performed by the Declaration of Helsinki. All respondents gave  
100 informed consent prior to conducting the interview. The study protocol was approved  
101 by the College of Nursing, Central South University, Nursing and Behavioral Medicine  
102 Research Ethics Review Committee (E202297).

## 103 **Results**

104 In total, 200 questionnaires were distributed and 188 copies were collected. After  
105 checking and excluding 4 cases of invalid questionnaires, 184 valid questionnaires were

106 recovered, with a valid recovery rate of 92%. Among the 184 individuals included in  
107 the analysis, the mean age was  $28.36 \pm 10.72$  (SD), and most of the patients were  
108 male (78.3%), had at least senior secondary education (92.4%), unmarried (61.9%), and  
109 not currently smoking (60.3%). The reasons for dental visiting were mainly swollen or  
110 bleeding gums (50.5%), about 34.8% of them were diagnosed with periodontitis. About  
111 45.7% of the sample attended dental appointments in the last year, and more than half  
112 of them (69.6%) self-assessed oral health status as fair.

113 The patients' OHL score levels ranged from 4 to 56 ( $43.07 \pm 9.920$ ), and the overall  
114 scores were normally distributed. A total of 46.7% of the study participants had  
115 adequate OHL with a median HeLD score of 44, we then used this number (44) to  
116 categorize the study subjects into inadequate OHL and adequate OHL groups.  
117 Participants who had HeLD scores  $\leq 44$  inadequate OHL, and those with HeLD  
118 scores  $> 44$  were categorized as adequate OHL.

119 Table 1 shows the common characteristics associated with oral health literacy.  
120 Significant differences in OHL scores were noted between different BMI classifications,  
121 sleep status, economic burden, whether they had seen a dentist in the last year, whether  
122 to rinse their mouth, dental Scaling, and whether their gums bled while brushing.

123 Table 2 presents the findings of the multivariable modelling by testing the independent  
124 variables associated with OHL. In the final model, the risk indicators included  
125 economic burden, mouthwash, gum bleeding, and dental visiting. Participants with  
126 economic burden tend to have inadequate OHL than their counterparts, and tend to be

127 less likely to rinse their mouth daily or visit the dentist than people with OHL, and  
 128 patients with inadequate OHL tend to have gum bleeding frequently.

129 **Table 1** Comparison of Oral health literacy scores among patients with different  
 130 demographic characteristics (N = No. of participants, % = percent)

| Variables                 | Total<br>(%) | Inadequate<br>OHL | High OHL | $\chi^2$<br>value | <i>P</i><br>value |
|---------------------------|--------------|-------------------|----------|-------------------|-------------------|
| <b>Gender</b>             |              |                   |          | 0.705             | 0.401             |
| Male                      | 144(78.3)    | 72(75.8)          | 72(80.9) |                   |                   |
| Female                    | 40(21.7)     | 23(24.2)          | 17(19.1) |                   |                   |
| <b>Ethnicity</b>          |              |                   |          | 0.008             | 0.930             |
| Han Chinese               | 177(96.2)    | 92(96.8)          | 85(95.5) |                   |                   |
| Ethnic Minority           | 7(3.8)       | 3(3.2)            | 4(4.5)   |                   |                   |
| <b>Age group(years)</b>   |              |                   |          | 6.672             | 0.083             |
| 18~25                     | 104(56.5)    | 56(58.9)          | 48(53.9) |                   |                   |
| 26~35                     | 54(29.3)     | 23(24.2)          | 31(34.8) |                   |                   |
| 36~55                     | 18(9.8)      | 9(9.5)            | 9(10.1)  |                   |                   |
| ≥56                       | 8(4.3)       |                   |          |                   |                   |
| <b>BMI classification</b> |              |                   |          | 8.359             | <b>0.015</b>      |
| Underweight               | 6(3.3)       | 6(6.3)            | 0(0.0)   |                   |                   |
| Normal weight             | 123(66.8)    | 60(63.2)          | 63(70.8) |                   |                   |

---

|                            |           |          |          |       |       |
|----------------------------|-----------|----------|----------|-------|-------|
| Overweight                 | 55(29.9)  | 29(30.5) | 26(29.2) |       |       |
| <b>Education level</b>     |           |          |          | 3.766 | 0.439 |
| Primary                    | 7(3.8)    | 5(5.3)   | 2(2.2)   |       |       |
| Junior Secondary           | 7(3.8)    | 5(5.3)   | 2(2.2)   |       |       |
| Senior Secondary           | 41(22.3)  | 23(24.2) | 18(20.2) |       |       |
| College                    | 69(37.5)  | 31(32.6) | 38(42.7) |       |       |
| Bachelor's and above       | 60(32.6)  | 31(32.6) | 29(32.6) |       |       |
| <b>Smoking</b>             |           |          |          | 0.156 | 0.693 |
| Non-smoker                 | 111(60.3) | 56(58.9) | 55(61.8) |       |       |
| Smoker                     | 73(39.7)  | 39(41.1) | 34(38.2) |       |       |
| <b>Alcohol consumption</b> |           |          |          | 0.704 | 0.402 |
| No                         | 129(70.1) | 64(67.4) | 65(73.0) |       |       |
| Yes                        | 55(29.9)  | 31(32.6) | 24(27.0) |       |       |
| <b>Work status</b>         |           |          |          | 4.533 | 0.209 |
| Full-time                  | 75(40.8)  | 42(44.2) | 33(37.1) |       |       |
| Unemployed                 | 16(8.7)   | 11(11.6) | 5(5.6)   |       |       |
| Retired                    | 5(2.7)    | 3(3.2)   | 2(2.2)   |       |       |
| Other                      | 88(47.8)  | 39(41.1) | 49(55.1) |       |       |
| <b>Marital Status</b>      |           |          |          | 1.992 | 0.158 |
| Married                    | 71(38.6)  | 32(33.7) | 39(43.8) |       |       |

---

|                                       |           |          |          |        |              |
|---------------------------------------|-----------|----------|----------|--------|--------------|
| Unmarried                             | 112(61.9) | 63(66.3) | 50(56.2) |        |              |
| <b>Living alone</b>                   |           |          |          | 0.705  | 0.401        |
| Yes                                   | 144(78.3) | 72(75.8) | 72(80.9) |        |              |
| No                                    | 40(21.7)  | 23(24.2) | 17(19.1) |        |              |
| <b>Sleeping status</b>                |           |          |          | 6.904  | <b>0.032</b> |
| Good                                  | 115(62.5) | 53(55.8) | 62(69.7) |        |              |
| Fair                                  | 61(33.2)  | 35(36.8) | 26(29.2) |        |              |
| Poor                                  | 8(4.3)    | 7(7.4)   | 1(1.1)   |        |              |
| <b>Place of residence</b>             |           |          |          | 0.870  | 0.351        |
| Urban                                 | 122(66.3) | 60(63.2) | 62(69.7) |        |              |
| Rural                                 | 62(33.7)  | 35(36.8) | 27(30.3) |        |              |
| <b>Monthly household income (RMB)</b> |           |          |          | 4.302  | 0.231        |
| ≤2000                                 | 19(10.3)  | 12(12.6) | 7(7.9)   |        |              |
| 2000~5000                             | 36(19.6)  | 22(23.2) | 14(15.7) |        |              |
| 5000~10000                            | 94(51.1)  | 47(49.7) | 47(52.8) |        |              |
| ≥10,000                               | 35(19.0)  | 14(14.7) | 21(23.6) |        |              |
| <b>Economic burden</b>                |           |          |          | 11.826 | <b>0.008</b> |
| None                                  | 71(38.6)  | 26(27.4) | 45(50.6) |        |              |
| Light                                 | 30(16.3)  | 17(17.9) | 13(14.6) |        |              |

|                                        |           |          |          |       |              |
|----------------------------------------|-----------|----------|----------|-------|--------------|
| Fair                                   | 69(37.5)  | 45(47.4) | 24(27.0) |       |              |
| Heavy                                  | 14(7.6)   | 7(7.4)   | 7(7.4)   |       |              |
| <b>Reason for dental visiting</b>      |           |          |          | 1.830 | 0.401        |
| Swollen or bleeding gums               | 93(50.5)  | 44(46.3) | 49(55.1) |       |              |
| Other discomforts                      | 58(31.5)  | 34(35.8) | 24(27.0) |       |              |
| Check-up or consultation               | 33(17.9)  | 17(17.9) | 16(18.0) |       |              |
| <b>Disease Type</b>                    |           |          |          | 4.749 | 0.461        |
| Caries                                 | 32(17.4)  | 18(18.9) | 14(15.7) |       |              |
| Periodontitis                          | 64(34.8)  | 28(29.5) | 36(40.4) |       |              |
| Oral mucosal disease                   | 4(2.2)    | 3(3.2)   | 1(1.1)   |       |              |
| Missing teeth                          | 19(10.3)  | 12(12.6) | 7(7.9)   |       |              |
| Fractured tooth                        | 4(2.2)    | 3(3.2)   | 1(1.1)   |       |              |
| Other                                  | 61(33.2)  | 31(32.6) | 30(33.7) |       |              |
| <b>Daily brushing frequency(times)</b> |           |          |          | 0.516 | 0.773        |
| 1                                      | 28(15.2)  | 16(16.8) | 12(13.5) |       |              |
| 2                                      | 143(77.7) | 73(76.8) | 70(78.7) |       |              |
| ≥3                                     | 13(7.1)   | 6(6.3)   | 7(7.9)   |       |              |
| <b>Mouth Rinse daily</b>               |           |          |          | 4.790 | <b>0.029</b> |
| No                                     | 86(46.7)  | 49(55.1) | 37(38.9) |       |              |

|                                             |           |          |          |       |              |
|---------------------------------------------|-----------|----------|----------|-------|--------------|
| Yes                                         | 98(53.3)  | 40(44.9) | 58(61.1) |       |              |
| <b>Dental cleaning</b>                      |           |          |          | 4.419 | <b>0.036</b> |
| No                                          | 135(73.4) | 76(80.0) | 59(66.3) |       |              |
| Yes                                         | 49(26.6)  | 19(20.0) | 30(33.7) |       |              |
| <b>Gingival bleeding on brushing</b>        |           |          |          | 7.302 | <b>0.007</b> |
| Never or sometimes                          | 163(88.6) | 82(95.3) | 81(82.7) |       |              |
| Often                                       | 21(11.4)  | 4(4.7)   | 17(17.3) |       |              |
| <b>Visited the dentist in the past year</b> |           |          |          | 3.856 | 0.050        |
| Yes                                         | 84(45.7)  | 50(52.6) | 34(38.2) |       |              |
| No                                          | 100(54.3) | 45(47.4) | 55(61.8) |       |              |
| <b>Self-rated oral health</b>               |           |          |          | 3.446 | 0.178        |
| Poor                                        | 28(15.2)  | 16(16.8) | 12(13.5) |       |              |
| Fair                                        | 128(69.6) | 69(72.6) | 59(66.3) |       |              |
| Good                                        | 28(15.2)  | 10(10.6) | 18(20.2) |       |              |

131

**Table 2** Logistic regression analysis of oral health literacy in dental patients

| Independent Variables | $\beta$ | SE    | Wald $\chi^2$ | P     | OR    | 95%CI         |
|-----------------------|---------|-------|---------------|-------|-------|---------------|
| Economic Burden       | 0.969   | 0.331 | 8.577         | 0.003 | 2.636 | (1.378-5.044) |
| Mouthwash (1)         | 0.889   | 0.326 | 7.445         | 0.006 | 2.433 | (1.285-4.608) |

|                     |        |       |        |       |       |                |
|---------------------|--------|-------|--------|-------|-------|----------------|
| Gum bleeding        | 1.335  | 0.616 | 4.700  | 0.030 | 3.798 | (1.137-12.694) |
| Dental visiting (1) | 0.634  | 0.322 | 3.879  | 0.049 | 1.885 | (1.003-3.543)  |
| Constants           | -1.175 | 0.339 | 12.036 | 0.001 | 0.309 |                |

132 **Discussion**

133 In this study, we examined oral health literacy and its associations with socio-  
134 demographics, oral health behaviors, and self-assessed oral health status among dental  
135 patients in China. Our research shows that oral health literacy was significantly related  
136 to socio-demographics, oral health behaviors, and oral health status but not to self-  
137 assessed oral health.

138 The results of this study showed that the OHL score of 184 patients was  $(43.46 \pm 9.239)$ ,  
139 which indicates that OHL was generally moderate in this sample. The score is in  
140 agreement with a study of older adults in Brazil[20] but is much lower than studies on  
141 adults in Brazil [14] and Malaysia [14] and Malaysia[21]. The reason may be the  
142 inequality in oral and dental health services in China, including social, economic,  
143 cultural, and environmental factors, insurance policies, and practices[22]. Moreover,  
144 there is a great imbalance in the distribution of dental practitioners among the provinces  
145 in China, neither the number of dental practitioners nor the number of dental visits is  
146 enough to meet the dental care demand in China as compared to developed  
147 countries[23]. There are also some personal factors, such as personal characteristics,  
148 health needs, and health behaviors[9, 11].

149 Among the reasons for consultation, more than half of the patients were due to gum

150 swelling or bleeding (50.5%), other discomforts accounted for about one-third, and only  
151 17.9% of the patients were due to physical examination or consultation, which is much  
152 lower than a study in the United States[21], which showed that more than half of the  
153 people (52.4%~60.5%) took the initiative for physical examination or consultation,  
154 while only 6.3%~7.6% of the people sought medical treatment for various discomforts,  
155 indicating that the awareness to seek oral health service utilization of patients in China  
156 is not good enough. The 4th National Oral Health Survey (2015-2016) in China indicate  
157 that about 20% of adults utilized oral health services in the past 12 months, but most of  
158 them (78.7%~93.7%) visited a dentist for treatment, and most of them sought the  
159 service motivated by pain[24]. Unfortunately, a relatively low level of dental service  
160 utilization is typically associated with a greater economic burden[25]. Increasing  
161 awareness of the importance of preventative rather than symptomatic dental visits will  
162 help to improve oral health and optimize dental care support, in line with China's  
163 longstanding national policy of a prevention-oriented model for the oral healthcare  
164 system and dental public health system[26].

165 Periodontitis (34.8%) and caries (17.4%) are common diseases among the patients who  
166 come to the clinic. Globally, dental caries and periodontal diseases (gingivitis and  
167 periodontitis) affect the majority of people, with treatment costs dominating the health  
168 care system[1]. The 4th National Oral Health Survey (2015-2016) in China shows that  
169 the percentage of periodontitis was about 52.8%~64.6%[27]. Past studies linked  
170 periodontal disease with many other non-infectious systemic diseases[28], and a recent

171 review suggests an association between periodontal disease and Alzheimer's  
172 disease[29]. Periodontal disease is negatively correlated with oral health-related quality  
173 of life[30], therefore, more attention should be paid to the prevention and treatment of  
174 periodontal disease.

175 Previous studies have shown proper brushing, and appropriate use of dental care  
176 products[31, 32]. Brushing is the basic method to maintain oral health, as it can remove  
177 supragingival plaque on the facial and lingual/palatal surfaces, our survey shows that  
178 92.9% of patients could brush their teeth twice a day or more. However, only half of  
179 the patients (53.3%) were able to rinse their mouths daily. Even fewer patients had a  
180 dental cleaning, accounting for only 26.6%. The results showed that the majority of  
181 patients had never had their teeth cleaned, probably because they had a low perception  
182 of the benefits of a dental cleaning or were not sufficiently motivated to do this, and did  
183 not receive the necessary social support[33]. A dental cleaning can effectively remove  
184 calculus, plaque, and food debris[34]. There is evidence that dental insurance plays an  
185 important role in determining dental cleanings. The availability of health insurance has  
186 a positive effect on dental cleanings. It is therefore possible to improve oral health by  
187 enrolling in a plan that offers dental insurance[35]. Studies have shown that perceived  
188 self-efficacy, perceived benefits and barriers, and fear of dentistry influence dental  
189 scaling practices[36]. The poor performance of the patient's dental cleaning behavior  
190 indicates the need for an intervention program designed to promote dental cleaning  
191 behavior. Self-efficacy and perceived benefits of dental cleaning should be increased to

192 reduce fears and barriers.

193 This study showed that 11.4% of patients had frequent gingival bleeding. Gingivitis is  
194 a common oral health problem, and untreated gingivitis can progress to periodontitis.  
195 Previous studies have shown that health-related lifestyles, such as a healthy diet, good  
196 oral health habits, and more frequent dental visits, are protective factors for the  
197 condition of the gums[37]. Gingival bleeding on brushing, as reported by self-report, is  
198 an important sentinel sign of periodontal disease, and gingival inflammation in  
199 particular. By identifying gingival bleeding on brushing, periodontal disease may be  
200 detected earlier, and better prevented and treated, thus reducing its global burden[38].

201 Our study shows that patients with inadequate OHL tended to rinse their mouths less  
202 and had a higher likelihood of bleeding gums. 54.3% of patients had a dental visit in  
203 the past year, much lower than the percentage of 89.5% in a Ugandan study[39].

204 Self-rated oral health is a comprehensive evaluation of the oral health of the participants  
205 based on their health and overall subjective feelings. This study showed that 15.2% of  
206 patients rated their oral health as poor, 69.6% rated their oral health as fair, and only  
207 15.4% rated their oral health as good, which is much lower than a survey of Indigenous  
208 Australians[40]. As a previous survey shows, compared with Netherlands 35-44-year-  
209 olds, Chinese 35-44-year-olds rated their oral health as poor or fair more often, and  
210 Netherlands 35-44-year-olds rated their oral health as very good four times more often  
211 than Chinese[41]. Overall, the better the self-rated oral health status, the higher the oral  
212 health literacy score. Previous studies have shown that self-rated oral health was

213 associated with oral health utilization among the Chinese population[24], patients with  
214 poorer self-rated oral health tend to have poorer oral health behaviors and oral health  
215 status[14], and overall health status also tends to be poorer, such as self-care and  
216 mobility, and oral health status is also closely related to mental health status, and  
217 patients with poorer oral health status also tend to have more severe anxiety and  
218 depression, etc.[40].

219 Characteristics associated with inadequate OHL were consistent with the scientific  
220 literature[22]. This study shows that economic burden is influential in oral health  
221 literacy. Patients with economic burdens tend to have inadequate OHL, which is  
222 consistent with previous studies[42].

223 Patients with adequate OHL were more likely to have a dental visit in the last year than  
224 patients with inadequate OHL, which has been confirmed by numerous studies[10].

225 OHL levels are correlated with dental service utilization, according to previous  
226 studies[20, 42]. Mialhe et al.[42] observed in Brazilian adults that the higher the OHL

227 levels, the more frequently they had a preventive dental checkup. However, this

228 correlation was not reflected in our study, probably due to the limited number of

229 participants in this study, especially the small percentage of patients who came for

230 consultation. Moreover, some of the medical checkup patients may be organized by

231 companies or hospitals instead of coming on their own, which has been mentioned by

232 investigators and medical institution managers. In the future, the sample size could be

233 further expanded and the patients who underwent medical checkups or initiated

234 consultations could be further subdivided to explore the correlation between OHL and  
235 the reasons for dental visiting.

236 This study shows that patients with economic pressure tend to have inadequate OHL.  
237 The results of this study support the previously established relationship between  
238 inadequate OHL and oral health behaviors including gargling and dental visiting[13,  
239 43]. In addition, we found an association between oral health literacy and gum bleeding  
240 during tooth brushing.

241 Our study is a novel one in the sense that it presents OHL, oral health behavior and oral  
242 health status data in China, where studies on OHL are just beginning. In this study, a  
243 validated instrument was used to measure wider aspects of OHL, such as the ability to  
244 interpret and use oral health information and services. While earlier tools mainly assess  
245 word recognition, numeracy, and reading skills, such as Rapid Estimate of Adult  
246 Literacy in Dentistry (REALD) or Test of Functional Health Literacy in Dentistry  
247 (ToFHLiD), and because the test language is English, it is less applicable in non-English  
248 speaking countries. HeLD-14 assesses a wide range of aspects of OHL and has been  
249 validated as having good psychometric properties. This was the first research to  
250 evaluate oral health literacy in dental patients in China. The inadequate OHL in this  
251 study was associated with some oral health behaviors and oral health status. Based on  
252 the results of our study, we find that in addition to health determinants, OHL can have  
253 a significant impact on oral health outcomes, oral health behaviors, and dental services  
254 use. The significance of this fact is that OHL can be changed through health promotion

255 strategies to positively impact oral health outcomes.

### 256 **Limitation**

257 This study has several limitations. First, we examined oral health literacy and oral  
258 health behaviors using a cross-sectional design. As a result, we could not examine the  
259 causality relationships between the two variables. Second, self-reported questionnaires  
260 are vulnerable to recall bias. Despite such limitations, our study is one of the few in the  
261 literature to examine the association between oral health literacy, oral health behavior,  
262 and oral health status in dental patients. The results of this study may serve as an  
263 evidence base to inform future studies.

### 264 **Conclusion**

265 The oral health literacy of dental patients is at a medium level overall. Oral health  
266 literacy among dental patients is associated with economic burden, mouthwash, gum  
267 bleeding, and dental visiting. Health care providers should consider improving oral  
268 health literacy among dental patients. OHL is an emerging research area, and critical  
269 information is still needed on its influencing factors, impact pathways, oral health  
270 outcomes, and intervention strategies. Future research can identify the influencing  
271 factors of oral health literacy and develop intervention strategies to improve oral health  
272 literacy levels and oral-related quality of life.

### 273 **Acknowledgment**

274 We thank the first Mobile Corps Hospital of the Chinese People's Armed Police Force  
275 for their support and cooperation.

276 **Funding sources**

277 None.

278 **Declaration of Competing Interest**

279 The authors declare no conflict of interest.

## References

1. Peres MA, Macpherson LMD, Weyant RJ, Daly B, Venturelli R, Mathur MR, Listl S, Celeste RK, Guarnizo-Herreño CC, Kearns C *et al*: **Oral diseases: a global public health challenge.** *Lancet* 2019, **394**(10194):249-260.
2. Hugo FN, Kassebaum NJ, Marcenes W, Bernabe E: **Role of Dentistry in Global Health: Challenges and Research Priorities.** *Journal of Dental Research* 2021, **100**(7):681-685.
3. Benzian H, Guarnizo-Herreño CC, Kearns C, Muriithi MW, Watt RG: **The WHO global strategy for oral health: an opportunity for bold action.** *The Lancet* 2021, **398**(10296):192-194.
4. He J, Yiting C, Xaiolin R, LI C, Tao H, Xuedong Z: **The current situation and future development of China's oral health care and public health system from the perspective of global emergencies (in Chinese).** *Journal of Sichuan University (Medical Edition)* 2022, **53**(01):43-48.
5. Xiang B, Wong HM, Perfecto AP, McGrath CPJ: **The effectiveness of behavioral interventions to improve oral health in adolescents at different periods of follow-up: A systematic review and meta-analysis.** *Patient Educ Couns* 2020, **103**(4):725-733.
6. Blizniuk A, Ueno M, Zaitso T, Kawaguchi Y: **Association of oral health literacy with oral health behaviour and oral health status**

- in Belarus.** *Community Dent Health* 2015, **32**(3):148-152.
7. Krausch-Hofmann S, Palmers E, Declerck D, Duyck J: **Development of practice guidelines for daily oral care in care-dependent older adults to complement the InterRAI suite of instruments using a modified Delphi approach.** *International Journal of Older People Nursing* 2021, **16**(1).
  8. Jiao J, Jing WD, Si Y, Feng XP, Tai BJ, Hu DY, Lin HC, Wang B, Wang CX, Zheng SG *et al*: **The prevalence and severity of periodontal disease in Mainland China: Data from the Fourth National Oral Health Survey (2015-2016).** *Journal of Clinical Periodontology* 2021, **48**(2):168-179.
  9. Mohammadi TM, Malekmohammadi M, Hajizamani HR, Mahani SA: **Oral health literacy and its determinants among adults in Southeast Iran.** *Eur J Dent* 2018, **12**(3):439-442.
  10. Fazli M, Yazdani R, Mohebbi SZ, Shamshiri AR: **Oral health literacy and socio-demographics as determinants of oral health status and preventive behavior measures in participants of a pre-marriage counseling program.** *PLoS One* 2021, **16**(11):e0258810.
  11. Khamrin P, Boonyathee S, Bootsikeaw S, Ong-Artborirak P, Seangpraw K: **Factors Associated with Health Literacy, Self-Efficacy, Social Support, and Oral Health Care Behaviors**

- Among Elderly in Northern Border Community Thailand.** *Clin Interv Aging* 2021, **16**:1427-1437.
12. Baskaradoss JK: **Relationship between oral health literacy and oral health status.** *BMC Oral Health* 2018, **18**(1):172.
  13. Cho HA, Im AJ, Sim YR, Jang HB, Lim HJ: **The association between oral health literacy and oral health behaviors in North Korean defectors: a cross-sectional study.** *BMC Public Health* 2020, **20**(1).
  14. Bado FMR, De Checchi MHR, Cortellazzi KL, Ju X, Jamieson L, Mialhe FL: **Oral health literacy, self-rated oral health, and oral health-related quality of life in Brazilian adults.** *Eur J Oral Sci* 2020, **128**(3):218-225.
  15. Yao K, Yao Y, Shen X, Lu C, Guo Q: **Assessment of the oral health behavior, knowledge and status among dental and medical undergraduate students: a cross-sectional study.** *BMC Oral Health* 2019, **19**(1):26.
  16. Su S, Lipsky MS, Licari FW, Hung M: **Comparing oral health behaviours of men and women in the United States.** *J Dent* 2022, **122**:104157.
  17. Olusile AO, Adeniyi AA, Orebanjo O: **Self-rated oral health status, oral health service utilization, and oral hygiene practices among adult Nigerians.** *BMC Oral Health* 2014, **14**:140.

18. Jones K, Brennan D, Parker E, Jamieson L: **Development of a short-form Health Literacy Dental Scale (HeLD-14)**. *Community Dentist Oral Epidemiol* 2015, **43**(2):143-151.
19. Yan W, Ju X, Jamieson L, Fan L: **Research on the Chineseization and reliability of a simplified version of the oral health literacy scale (in Chinese)**. *Chinese Nursing Research* 2021, **35**(20):3612-3616.
20. Tenani CF, De Checchi MHR, Bado FMR, Ju X, Jamieson L, Mialhe FL: **Influence of oral health literacy on dissatisfaction with oral health among older people**. *Gerodontology* 2020, **37**(1):46-52.
21. Lopes RT, Neves É TB, Dutra LDC, Gomes MC, Paiva SM, Abreu M, Ferreira FM, Granville-Garcia AF: **Socioeconomic status and family functioning influence oral health literacy among adolescents**. *Rev Saude Publica* 2020, **54**:30.
22. Bastani P, Mohammadpour M, Mehraliain G, Delavari S, Edirippulige S: **What makes inequality in the area of dental and oral health in developing countries? A scoping review**. *Cost Eff Resour Alloc* 2021, **19**(1):54.
23. Liu DL, Xie YF, Shu R: **Statistical Analysis of Current Oral Health Care and Dental Education Resources in China**. *Chin J Dent Res* 2019, **22**(1):37-43.
24. Xu M, Cheng M, Gao X, Wu H, Ding M, Zhang C, Wang X, Feng

- X, Tai B, Hu D *et al*: **Factors associated with oral health service utilization among adults and older adults in China, 2015-2016.** *Community Dent Oral Epidemiol* 2020, **48**(1):32-41.
25. Cheng ML, Xu MR, Xie YY, Gao XL, Wu HJ, Wang X, Feng XP, Tai BJ, Hu Y, Lin HC *et al*: **Utilisation of Oral Health Services and Economic Burden of Oral Diseases in China.** *Chin J Dent Res* 2018, **21**(4):275-284.
26. Cai H, Cheng YT, Ren XL, Cheng L, Hu T, Zhou XD: **Recent Developments and Future Directions of Oral Healthcare System and Dental Public Health System in China in Light of the Current Global Emergency.** *Sichuan Da Xue Xue Bao Yi Xue Ban* 2022, **53**(1):43-48.
27. Jiao J, Jing W, Si Y, Feng X, Tai B, Hu D, Lin H, Wang B, Wang C, Zheng S *et al*: **The prevalence and severity of periodontal disease in Mainland China: Data from the Fourth National Oral Health Survey (2015-2016).** *J Clin Periodontol* 2021, **48**(2):168-179.
28. Carrizales-Sepúlveda EF, Ordaz-Farías A, Vera-Pineda R, Flores-Ramírez R: **Periodontal Disease, Systemic Inflammation and the Risk of Cardiovascular Disease.** *Heart Lung Circ* 2018, **27**(11):1327-1334.
29. Borsa L, Dubois M, Sacco G, Lupi L: **Analysis the Link between Periodontal Diseases and Alzheimer's Disease: A Systematic**

- Review. *Int J Environ Res Public Health* 2021, **18**(17).**
30. Wong LB, Yap AU, Allen PF: **Periodontal disease and quality of life: Umbrella review of systematic reviews.** *J Periodontal Res* 2021, **56**(1):1-17.
  31. Barbe AG, Kottmann HE, Derman SHM, Noack MJ: **Efficacy of regular professional brushing by a dental nurse for 3 months in nursing home residents-A randomized, controlled clinical trial.** *International Journal of Dental Hygiene* 2019, **17**(4):327-335.
  32. Aspinall SR, Parker JK, Khutoryanskiy VV: **Oral care product formulations, properties and challenges.** *Colloids and Surfaces B-Biointerfaces* 2021, **200**.
  33. Shahrabaki BN, Hashemian M, Fallahi A, Rahmani A, Saedpanah A: **The Relationship between Stages of Dental Cleaning Behavior Change Based on Trans-theoretical Model (TTM) with School Role and Social Support in Students.** *International Journal of Pediatrics-Mashhad* 2017, **5**(5):4939-4949.
  34. Barbe AG, Kottmann HE, Hamacher S, Derman SHM, Noack MJ: **Efficacy and acceptance of professional dental cleaning among nursing home residents.** *Clinical Oral Investigations* 2019, **23**(2):707-713.
  35. Robison V, Bauman B, D'Angelo DV, Espinoza L, Thornton-Evans G, Lin M: **The Impact of Dental Insurance and Medical**

- Insurance on Dental Care Utilization During Pregnancy.** *Maternal and Child Health Journal* 2021, **25**(5):832-840.
36. Allahqoli L, Nithyanantham V, Rahmani A, Fallahi A, Fathi M, Azadi NA, Pashaei T, Volken T: **The Effects of Trans-Theoretical Model and Fear of Dental Care on Dental Cleaning Behavior among Students.** *International Journal of Pediatrics-Mashhad* 2019, **7**(8):9853-9861.
37. Chen H, Zhang R, Cheng R, Xu T, Zhang T, Hong X, Zhao X, Wu Y, Cheng L, Hu T: **Gingival bleeding and calculus among 12-year-old Chinese adolescents: a multilevel analysis.** *BMC Oral Health* 2020, **20**(1):147.
38. Deng K, Pelekos G, Jin L, Tonetti MS: **Gingival bleeding on brushing as a sentinel sign of gingival inflammation: A diagnostic accuracy trial for the discrimination of periodontal health and disease.** *J Clin Periodontol* 2021, **48**(12):1537-1548.
39. Ocwia J, Olum R, Atim P, Laker F, Okot J, Sereke SG, Baluku JB, Kiguli S, Bongomin F: **Oral health seeking behaviors of adults in Nebbi District, Uganda: a community-based survey.** *BMC Oral Health* 2021, **21**(1):453.
40. Ju X, Hedges J, Garvey G, Smith M, Canfell K, Jamieson L: **Poor self-rated oral health associated with poorer general health among Indigenous Australians.** *BMC Public Health* 2021,

21(1):424.

41. Thomson WM, He SL, Elani HW: **Self-report oral health and disease experience among adults in China and NZ.** *Clin Oral Investig* 2019, **23**(5):2123-2128.
42. Mialhe FL, Santos BL, Bado FMR, Oliveira Júnior AJ, Soares GH: **Association between oral health literacy and dental outcomes among users of primary healthcare services.** *Braz Oral Res* 2022, **36**:e004.
43. Ueno M, Takeuchi S, Oshiro A, Kawaguchi Y: **Relationship between oral health literacy and oral health behaviors and clinical status in Japanese adults.** *Journal of Dental Sciences* 2013, **8**(2):170-176.
